# Supplementary material for: High-rate electrochemical lithium-ion storage through Li+ intercalation pseudocapacitance in the Pr1/3NbO3 anode
Source: Royal Society of Chemistry journal article supplement (doi:10.1039/d2ta03741f), 2022-01-01
Supplement: d2ta03741f1.pdf [file d2ta03741f1.pdf]

# **High-rate electrochemical lithium-ion storage through Li<sup>+</sup> intercalation pseudocapacitance in Pr<sub>1/3</sub>NbO<sub>3</sub> anode**

*Guisheng Liang<sup>a,b</sup>, Liting Yang<sup>b</sup>, Xuhui Xiong<sup>b</sup>, Xianhu Liu<sup>d</sup>, Xuefeng Zhang<sup>e</sup>, Renchao Che<sup>a,b,c\*</sup>*

<sup>a</sup>Materials Genome Institute, Shanghai University, Shanghai, China.

\*E-mail: rcche@fudan.edu.cn

<sup>b</sup>Laboratory of Advanced Materials, Shanghai Key Lab of Molecular Catalysis and Innovative Materials, Department of Materials Science, Fudan University, Shanghai 200438, P. R. China

<sup>c</sup>Zhejiang Laboratory, Hangzhou 311100, China

<sup>d</sup>Key Laboratory of Materials Processing and Mold, Zhengzhou University, Ministry of Education, Zhengzhou 450002, P. R. China.

<sup>e</sup>Institute of Advanced Magnetic Materials, College of Materials and Environmental Engineering, Hangzhou Dianzi University, Hangzhou 310012, P. R. China.

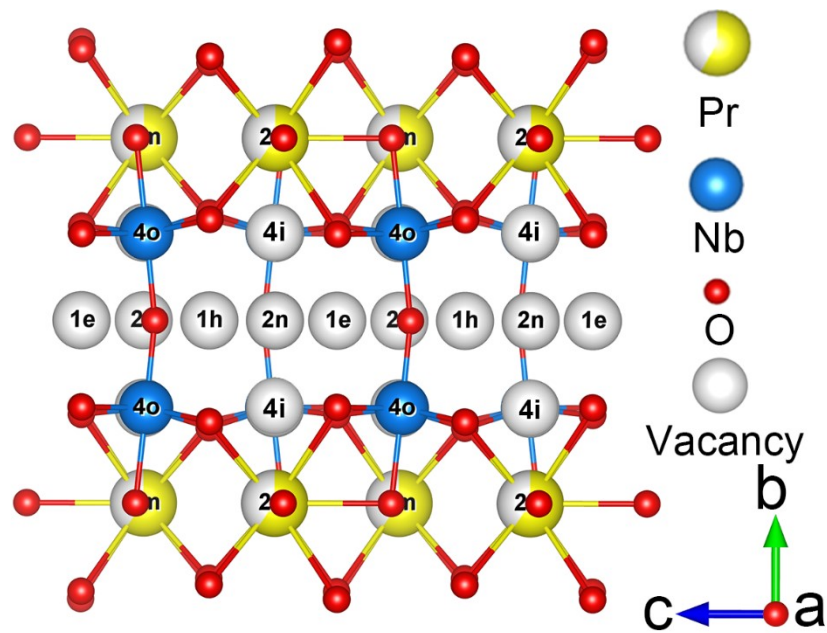

**Fig. S1.** The 1e, 1h, 2n, 4o and 4i sites in  $\text{Pr}_{1/3}\text{NbO}_3$  lattice.

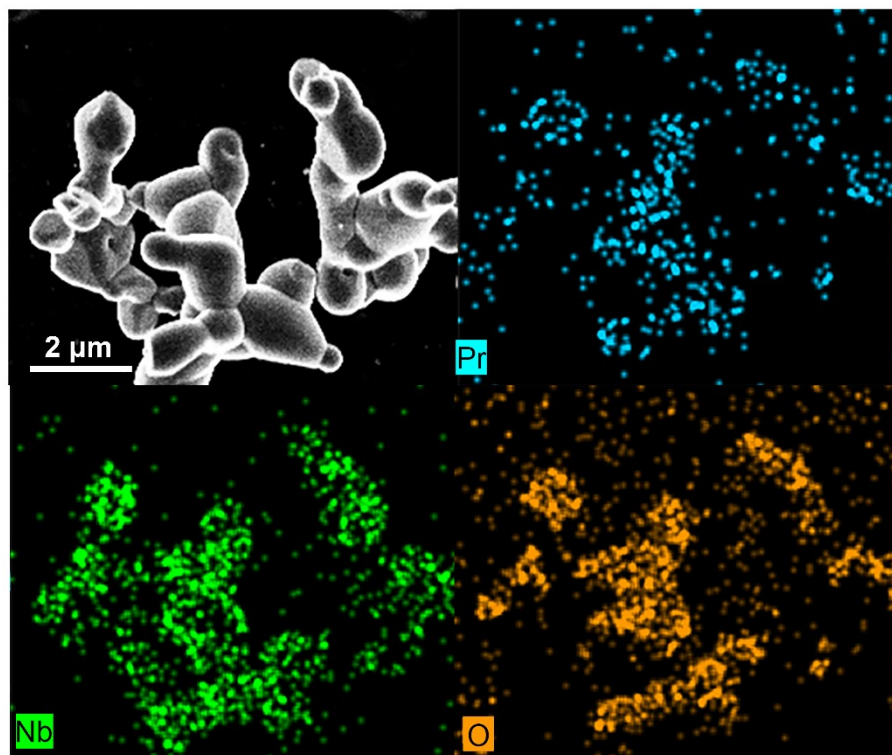

**Fig. S2.** EDS mapping images of Pr, Nb, and O taken from the selected section.

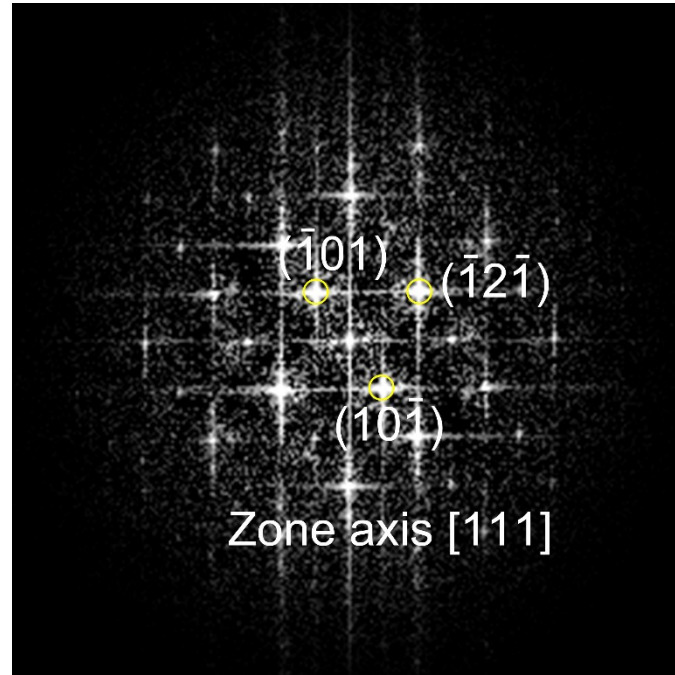

**Fig. S3.** SAED image original from HAADF image of  $\text{Pr}_{1/3}\text{NbO}_3$ .

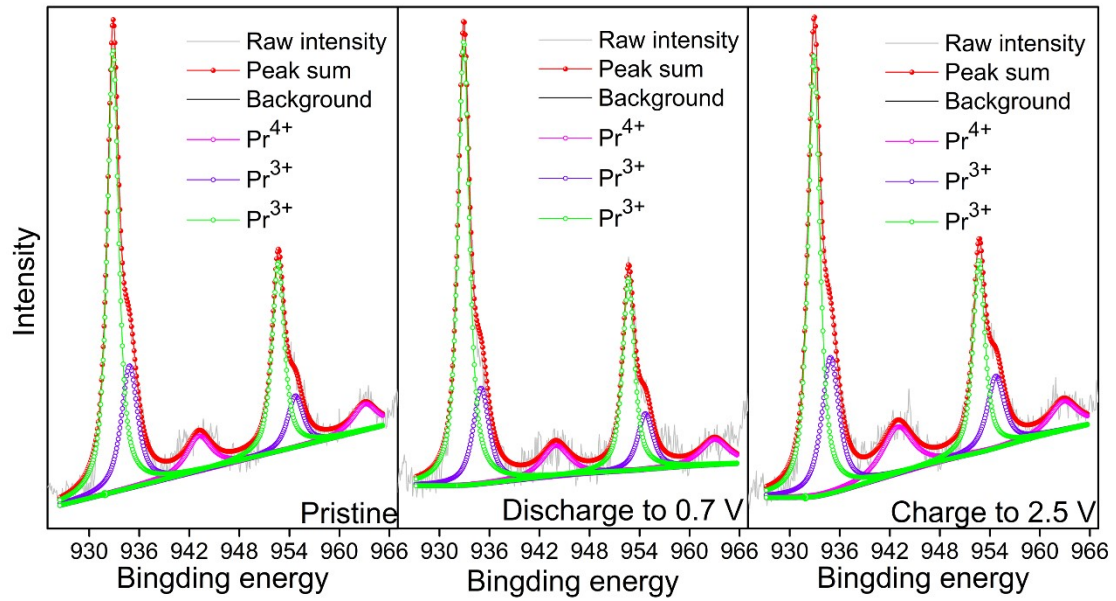

**Fig. S4.** *Ex-situ* Pr-3*d* XPS spectra at different lithiation states.

For pristine  $\text{Pr}_{1/3}\text{NbO}_3$ , the peaks at 932.9, 934.9, 952.8, and 954.9 eV are attributed to  $\text{Pr}^{3+}$  and the peaks at 943.1 and 963.1 eV are ascribed to  $\text{Pr}^{4+}$  in the Pr-3*d* XPS spectra. During the lithiation and delithiation, no obvious change in the characteristic peaks of  $\text{Pr}^{3+}$  and  $\text{Pr}^{4+}$  is detected and no new XPS peaks can be separated from the XPS spectrum of Pr 3*d*. This finding demonstrates that Pr does not undergo redox reactions during the discharge/charge process and does not contribute to the capacity of  $\text{Pr}_{1/3}\text{NbO}_3$ .

**Table S1.** Fractional atomic parameters of  $\text{Pr}_{1/3}\text{NbO}_3$  with P2/m space group.

| atom | site | $x$      | $y$      | $z$      | occupancy |
|------|------|----------|----------|----------|-----------|
| Pr   | $2m$ | 0.248232 | 0.0000   | 0.751840 | 0.6667    |
| Nb   | $4o$ | 0.253088 | 0.261104 | 0.249832 | 1.000     |
| O1   | $2n$ | 0.240744 | 0.5000   | 0.252841 | 1.000     |
| O2   | $2m$ | 0.220253 | 0        | 0.211661 | 1.000     |
| O3   | $2l$ | 0.5000   | 0.211041 | 0.5000   | 1.000     |
| O4   | $2k$ | 0.0000   | 0.203417 | 0.5000   | 1.000     |
| O5   | $2j$ | 0.5000   | 0.251392 | 0.0000   | 1.000     |
| O6   | $2i$ | 0.0000   | 0.277733 | 0.0000   | 1.000     |

**Table S2.** Lattice parameters of  $\text{Pr}_{1/3}\text{NbO}_3$ .

| Sample                        | $a$ (Å)  | $b$ (Å)  | $c$ (Å)  | $\alpha = \gamma$ (°) | $\beta$ (°) | $V$ (Å <sup>3</sup> ) |
|-------------------------------|----------|----------|----------|-----------------------|-------------|-----------------------|
| $\text{Pr}_{1/3}\text{NbO}_3$ | 5.518081 | 7.870665 | 5.518272 | 90                    | 90.205      | 239.662               |

The  $R_{\text{wp}}$  (weighted profile residual) of  $\text{Pr}_{1/3}\text{NbO}_3$  is 0.1095.

The theoretical capacity of  $\text{Pr}_{1/3}\text{NbO}_3$  is calculated by the following method:

$$Q_{\text{theoretical}} = \frac{nF}{3.6M} = \frac{2 \times 96485.3 \text{ C mol}^{-1}}{3.6 \text{ C mA}^{-1} \text{ h}^{-1} \times 187.87 \text{ g mol}^{-1}} = 285.3 \text{ mA g}^{-1}$$

where  $n$  is the number of electrons transferred per formula unit,  $F$  is Faraday's constant, 3.6 is a conversion factor between coulombs and the conventional milliamper-hour and  $M$  is the mass per formula unit. For intercalation Nb-based anode,  $\text{Nb}^{5+}$  can be reduce to  $\text{Nb}^{3+}$  with two electron transfer. Therefore, the value of  $n$  is 2 in the above equation.

The kinetic analyses of the  $\text{Li}^+$  storage in  $\text{Pr}_{1/3}\text{NbO}_3$  was conducted using CV tests at various scan rates ranging from 0.2 to 0.5  $\text{mV s}^{-1}$ . In this case, the pseudocapacitive contribution to the electrochemical capacity can be calculated based on **Equation (1)**.

[S1]

$$i(\text{V}) = k_a v + k_b v^{1/2} \quad (1)$$

where,  $i(\text{V})$  is the total current at a given voltage,  $v$  is the scan rate, and  $k_p$  and  $k_d$  are adjustable factors.  $K_a v$  and  $k_b v^{1/2}$  are the currents from the pseudocapacitive contribution and the diffusion-controlled process, respectively.

The  $\text{Li}^+$  diffusion coefficients ( $D_{\text{Li}}$ ) were calculated from GITT data based on **Equation (2)**. [S2-S5]

$$D_{\text{Li}} = \frac{4}{\pi t} \left( \frac{m_B V_m}{M_B S} \right)^2 \left( \frac{\Delta E_S}{\Delta E_\tau} \right)^2 \quad (t \ll L^2/D_{\text{Li}}) \quad (2)$$

where,  $m_B$ ,  $M_B$ ,  $V_m$  and  $L$  present the mass, molar mass, and molar volume, of the active material, respectively;  $S$  is the surface area and linear length of the working electrode;  $t$  is the time during which a constant current is applied;  $\Delta E_S$  and  $\Delta E_\tau$  respectively embody the change in the equilibrium voltage and the change in voltage during the current pulse. Based on **Equation (2)** the apparent  $\text{Li}^+$  diffusion coefficients of  $\text{Pr}_{1/3}\text{NbO}_3$  during different discharge/charge states are obtained and displayed in **Fig. 4f**.

**Table S3.** Comparisons of average  $\text{Li}^+$  diffusion coefficients ( $D_{\text{Li}}$ ) of  $\text{Pr}_{1/3}\text{NbO}_3$  with those of fast charging anode materials previously reported. The  $\text{Li}^+$  diffusion coefficients were calculated through GITT.

| material                                       | $D_{\text{Li}}$ ( $\text{cm}^2 \text{ s}^{-1}$ ) | reference |
|------------------------------------------------|--------------------------------------------------|-----------|
| $\text{Pr}_{1/3}\text{NbO}_3$                  | $1.78 \times 10^{-11}$                           | This work |
| $\text{Cu}_2\text{Nb}_{34}\text{O}_{87}$       | $3.5 \times 10^{-13}$                            | S6        |
| $\text{MoNb}_{12}\text{O}_{33}$                | $3.9 \times 10^{-14}$                            | S7        |
| $\text{Al}_{0.5}\text{Nb}_{24.5}\text{O}_{62}$ | $1.65 \times 10^{-12}$                           | S8        |
| $\text{TiNb}_2\text{O}_7$                      | $4.28 \times 10^{-14}$                           | S9        |
| $\text{Zn}_2\text{Nb}_{34}\text{O}_{87}$       | $5.6 \times 10^{-12}$                            | S10       |
| $\text{Li}_4\text{Ti}_5\text{O}_{12}$          | $3.27 \times 10^{-12}$                           | S11       |
| $\text{HfNb}_{24}\text{O}_{62}$                | $1.51 \times 10^{-13}$                           | S12       |

Figure 4a illustrates the CV curves of the  $\text{Pr}_{1/3}\text{NbO}_3||\text{Li}$  half cell at 0.2, 0.3, 0.4 and 0.5  $\text{mV s}^{-1}$ , respectively. It is found from Figure 4d that the cathodic/anodic peak current ( $I_p$ ) during the intensive  $\text{Nb}^{4+}/\text{Nb}^{5+}$  redox reactions delivered a linear relationship with the square root of the sweep rate ( $v^{0.5}$ ). Therefore, the  $\text{Li}^+$  diffusion coefficients ( $D_{\text{Li}}$ ) of  $\text{Pr}_{1/3}\text{NbO}_3$  can be calculated based on the Randles–Sevcik Equation (3):<sup>S13</sup>

$$I_p = 2.69 \times 10^5 \times n^{1.5} C S D_{\text{Li}}^{0.5} v^{0.5} \quad (3)$$

where  $n$  is the charge transfer number,  $S$  is the surface area of the electrode, and  $C$  is the allowed  $\text{Li}^+$  molar concentration in  $\text{Pr}_{1/3}\text{NbO}_3$  crystals. The calculated apparent  $\text{Li}^+$  diffusion coefficients of  $\text{Pr}_{1/3}\text{NbO}_3$  are  $2.83 \times 10^{-11}$  (lithiation) and  $4.01 \times 10^{-11} \text{ cm}^2 \text{ s}^{-1}$  (lithiation).



## Reference

- S1. R. J. Li, X. Z. Zhu, Q. F. Fu, G. L. Liang, Y. J. Chen, L. J. Luo, M. Y. Dong, Q. Shao, C. F. Lin, R. B. Wei, Z. H. Guo, *Chem. Commun.*, 2019, **55**, 2493.
- S2. A. J. Bard, L. R. Faulkner, *Fundamentals and Applications*, 2nd ed., Wiley, New York, 2001.
- S3. X. Z., Zhu, J. Xu, Y. P. Luo, Q. F. Fu, G. S. Liang, L. J. Luo, Y. J. Chen, C. F. Lin, X. S. Zhao, *J. Mater. Chem. A*, 2019, **7**, 6522.
- S4. Q. F. Fu, R. J. Li, X. Z. Zhu, G. S. Liang, L. J. Luo, Y. J. Chen, C. F. Lin, X. S. Zhao, Design, synthesis and lithium-ion storage capability of  $\text{Al}_{0.5}\text{Nb}_{24.5}\text{O}_{62}$ , *J. Mater. Chem. A*, 2019, **7**, 19862.
- S5. X. Z. Zhu, H. J. Cao, R. J. Li, Q. F. Fu, G. S. Liang, Y. J. Chen, L. J. Luo, C. F. Lin, X. S. Zhao, *J. Mater. Chem. A*, 2019, **7**, 25537.
- S6. L. Yang, X. Zhu, X. Li, X. Zhao, K. Pei, W. You, X. Li, Y. Chen, C. Lin, R. Che, *Adv. Energy Mater.* 2019, **9**, 1902174.
- S7. X. Zhu, J. Xu, Y. Luo, Q. Fu, G. Liang, L. Luo, Y. Chen, C. Lin, X. Zhao, *J. Mater. Chem. A*, 2019, **7**, 6522–6532.
- S8. Q. Fu, R. Li, X. Zhu, G. Liang, L. Luo, Y. Chen, C. Lin, X. Zhao, Design, *J. Mater. Chem. A*, 2019, **7**, 19862–19871.
- S9 B. Babu, M.M. Shaijumon, *Electrochimica Acta*, 2020, **345**, 136208.
- S10. X. Zhu, H. Cao, R. Li, Q. Fu, G. Liang, Y. Chen, L. Luo, C. Lin, X. Zhao, *J. Mater. Chem. A*, 2019, **7**, 25537–25547.
- S11. F. Wunde, F. Berkemeier, G. Schmitz, *J. Power Sources*, 2012, **215**, 109–115.
- S12. Q. Fu, H. Cao, G. Liang, L. Luo, Y. Chen, V. Murugadoss, S. Wu, T. Ding, C. Lin, Z. Guo, *Chem. Commun.*, 2020, **56**, 619–622.
- S13. A. J. Bard, L. R. Faulkner, *Electrochemical Methods: Fundamentals and Applications*, 2nd edn., Wiley, New York, USA 2001.
